# Supplementary material for: Unveiling the role of structure–polarity interplay in non-ionic micellar catalyzed oxidative transformation of isoleucine: towards sustainable oxidation in aqueous media
Source: Royal Society of Chemistry journal article supplement (doi:10.1039/d5nj03981a), 2025-01-01
Supplement: d5nj03981a1.pdf [file d5nj03981a1.pdf]

## **Supporting Information File**

### **Unveiling the Role of Structure-Polarity Interplay in Non-Ionic Micellar Catalyzed Oxidative Transformation of Isoleucine: Towards Sustainable Oxidation in Aqueous Media**

Priya Karmakar<sup>a</sup>, Mousumi Layek<sup>a</sup>, Kripasindhu Karmakar<sup>a</sup>, Sandip Kundu<sup>a</sup>, Sk Meheebub Rahaman<sup>a</sup>, Nargis Khatun<sup>a</sup>, Arnab Patra<sup>a</sup>, Ujjwal Mandal<sup>a,\*</sup>, Bidyut Saha<sup>a,\*</sup>

<sup>a</sup>Surfactant Chemistry Laboratory, Department of Chemistry, The University of Burdwan, Burdwan-713104, West Bengal, India

\*Corresponding authors

Email addresses: [umandal@chem.buruniv.ac.in](mailto:umandal@chem.buruniv.ac.in) (UM), [b\\_saha31@redifmail.com](mailto:b_saha31@redifmail.com) (BS), [bsaha@chem.buruniv.ac.in](mailto:bsaha@chem.buruniv.ac.in) (BS)

## Content

| Figure no.       | Figure caption                                                                                                                                                                                                                                                                                                                                            | Page no. |
|------------------|-----------------------------------------------------------------------------------------------------------------------------------------------------------------------------------------------------------------------------------------------------------------------------------------------------------------------------------------------------------|----------|
| <b>Figure S1</b> | FT-IR spectrum: (A) oxidized product (2-methylbutanal) and (B) hydrazone derivative of corresponding aldehyde product                                                                                                                                                                                                                                     | 3        |
| <b>Figure S2</b> | CMC determination of surfactants by surface-tension method; (A) TX 100 and (B) Tween 20 micellar medium                                                                                                                                                                                                                                                   | 4        |
| <b>Figure S3</b> | Determination of CMC using fluorometric method for (A) Tween 20 (B) TX-100 micellar microenvironment.                                                                                                                                                                                                                                                     | 5        |
| <b>Figure S4</b> | Sequential scanned spectra and plot of $-\ln(\text{Abs})_{420}$ vs time (minutes) of oxidation of isoleucine in presence of (A) in 0.02 mM Tween 20 at 5 min int and (B) in 0.4 mM TX 100 at 5 min int. [Reaction condition: [isoleucine] = $6 \times 10^{-3}$ (M), [NaOH] = 0.8 (M), $[\text{Fe}(\text{CN})_6]^{3-} = 4 \times 10^{-4}$ (M), T = 30 °C.] | 6        |
| <b>Figure S5</b> | $^1\text{H}$ -NMR spectrum (in $\text{D}_2\text{O}$ solvent) of (A) Tween 20, (B) Tween 20 + isoleucine, (C) TX 100, and (D) TX 100 + isoleucine                                                                                                                                                                                                          | 7        |
| <b>Table S1</b>  | The hydrodynamic diameter (nm) and polydispersity index (PDI) of surfactant systems in presence and absence of substrate as obtained from the dynamic light scattering (DLS) measurement                                                                                                                                                                  | 8        |
| <b>Table S2</b>  | The Fitting parameters for 0.2 mM Tween 20 micellar medium                                                                                                                                                                                                                                                                                                | 9        |
| <b>Table S3</b>  | The Fitting parameters for 0.8 mM TX 100 micellar medium                                                                                                                                                                                                                                                                                                  | 10       |

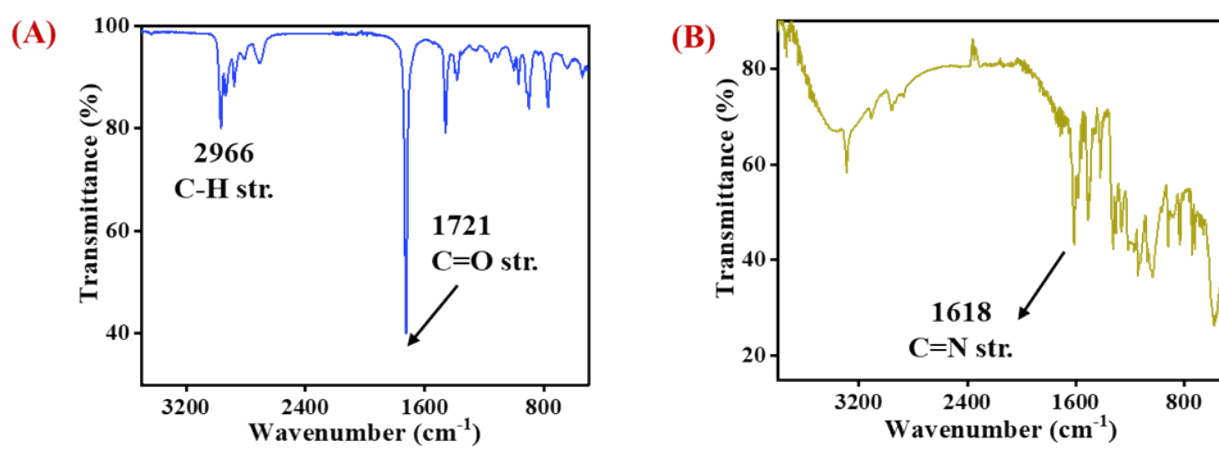

**Figure S1.** FT-IR spectrum: (A) oxidized product (2-methylbutanal) and (B) hydrazone derivative of corresponding aldehyde product

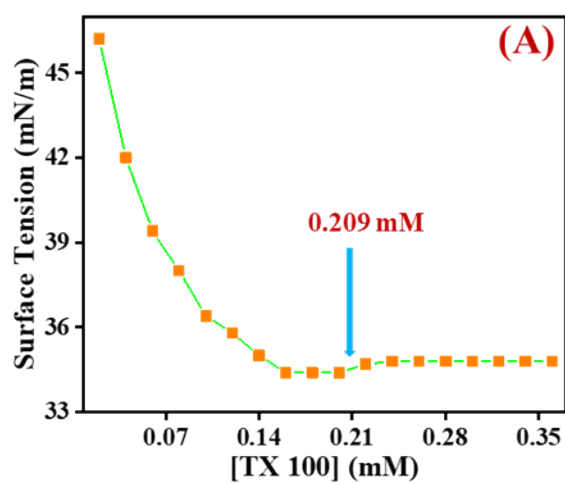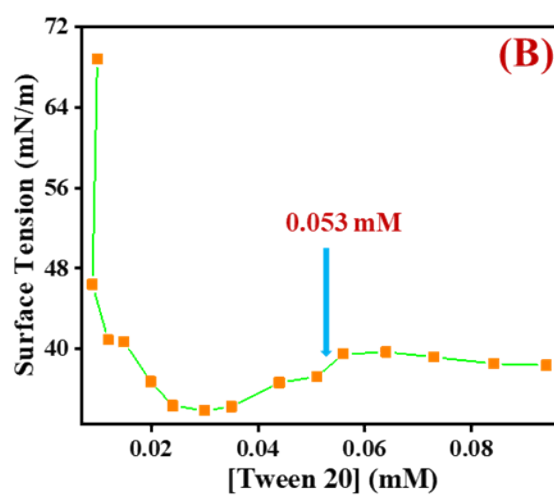

**Figure S2:** CMC determination of surfactants by surface-tension method; (A) TX 100 and (B) Tween 20 micellar medium

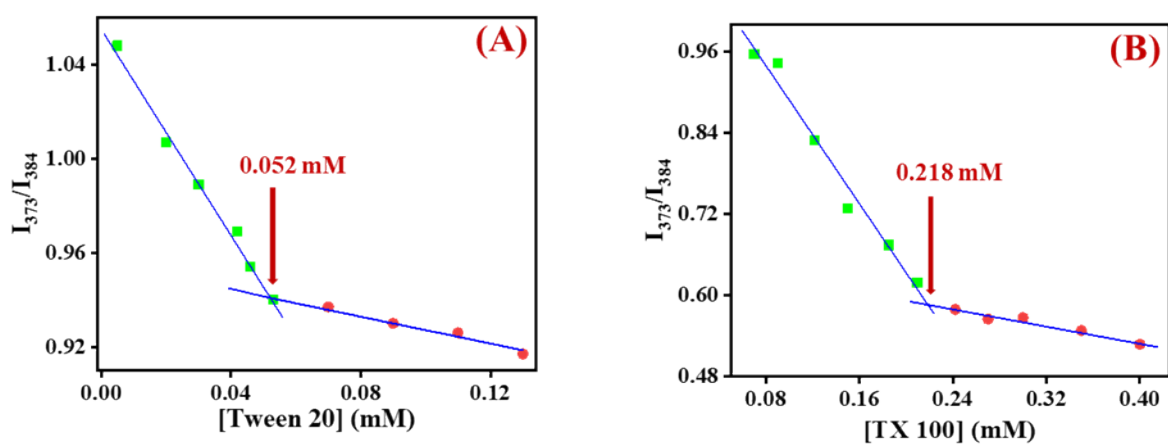

**Figure S3.**

Determination of CMC using fluorometric method for (A) Tween 20 (B) TX-100 micellar microenvironment.

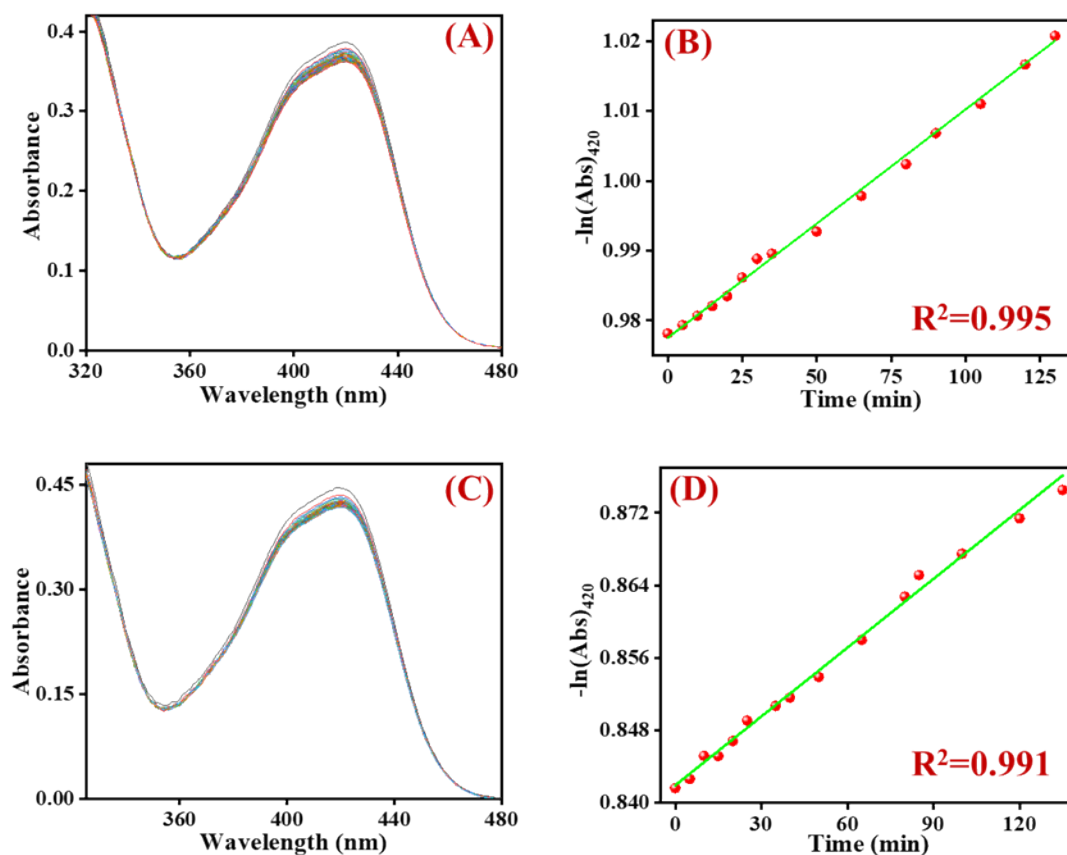

**Figure S4.** Sequential scanned spectra and plot of  $-\ln(\text{Abs})_{420}$  vs time (minutes) of oxidation of isoleucine in presence of (A) in 0.02 mM Tween 20 at 5 min int and (B) in 0.4 mM TX 100 at 5 min int. [Reaction condition: [isoleucine] =  $6 \times 10^{-3}$  (M), [NaOH] = 0.8 (M),  $[\text{Fe}(\text{CN})_6]^{3-} = 4 \times 10^{-4}$  (M),  $T = 30^\circ \text{C}$ .]

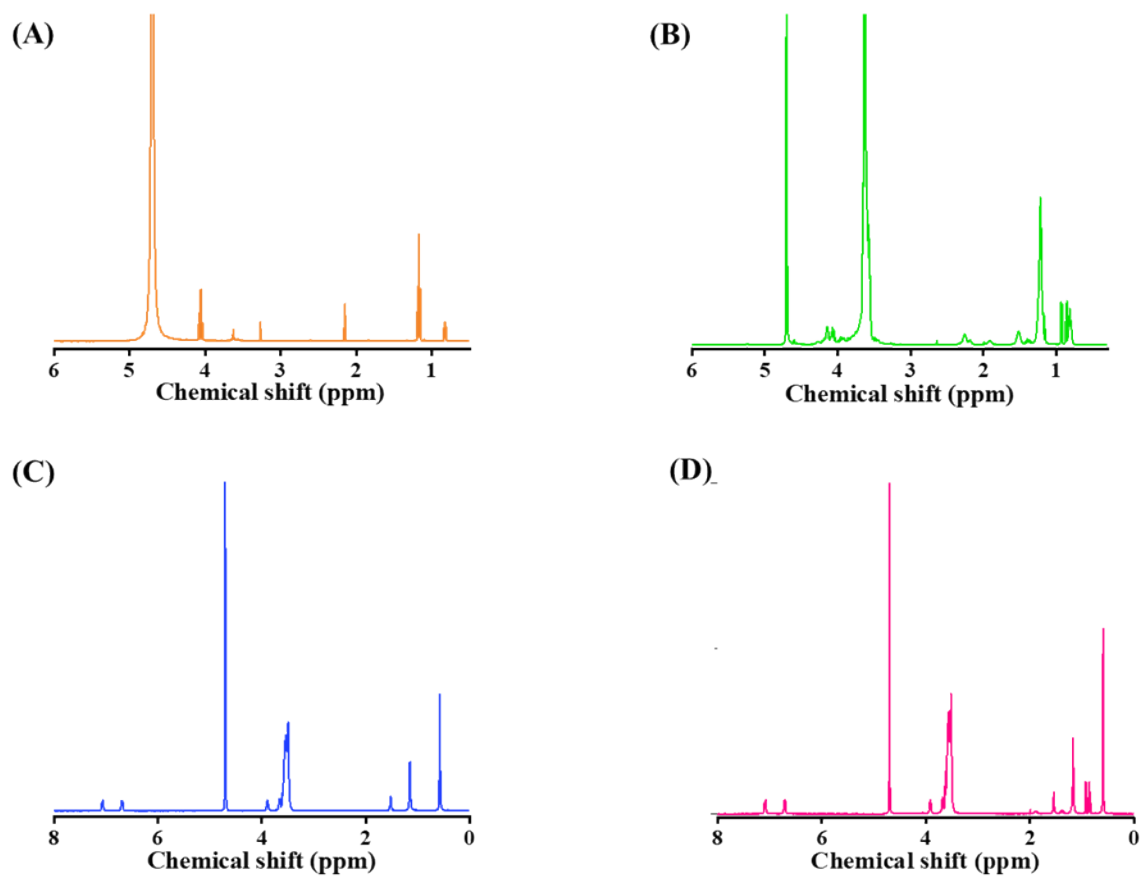

**Figure S5.**  $^1\text{H}$ -NMR spectrum (in  $\text{D}_2\text{O}$  solvent) of (A) Tween 20 , (B) Tween 20 + isoleucine, (C) TX 100, and (D) TX 100 + isoleucine

| Systems                   | Hydrodynamic diameter(nm) | PDI   |
|---------------------------|---------------------------|-------|
| 0.2 mM TW-20              | 44.5                      | 0.790 |
| 0.2 mM TW-20 +isoleucine  | 69.5                      | 0.383 |
| 0.8 mM TX-100             | 32.2                      | 0.210 |
| 0.8 mM TX-100 +isoleucine | 43.3                      | 0.353 |

**Table S1:** The hydrodynamic diameter (nm) and polydispersity index (PDI) of surfactant systems in presence and absence of substrate as obtained from the dynamic light scattering (DLS) measurement



**Table S2:** The Fitting parameters for 0.2 mM Tween 20 micellar medium

| Composition        | $\tau_1$  | $a_1$ (%) | $\tau_2$ | $a_2$ (%) | $\langle \tau \rangle$ (ns) | $\chi^2$ |
|--------------------|-----------|-----------|----------|-----------|-----------------------------|----------|
| 0.2 mM<br>Tween 20 | 0.5797895 | 71.28     | 6.789833 | 28.72     | 5.7038                      | 1.028236 |

**Equation used for life time calculation:**

$$\langle \tau \rangle = (a_1(\tau_1)^2 + a_2(\tau_2)^2) / (a_1\tau_1 + a_2\tau_2)$$

**Table S3:** The Fitting parameters for 0.8 mM TX 100 micellar medium

| Composition   | $\tau_1$ | $a_1$ (%) | $\tau_2$ | $a_2$ (%) | $\tau_3$      | $a_3$ (%) | $\langle \tau \rangle$ (ns) | $\chi^2$ |
|---------------|----------|-----------|----------|-----------|---------------|-----------|-----------------------------|----------|
| 0.8 mM TX 100 | 4.012909 | 6.69      | 189.4214 | 62.52     | 0.106982<br>1 | 30.79     | 189                         | 1.088399 |

**Equation used for life time calculation:**

$$\langle \tau \rangle = (a_1(\tau_1)^2 + a_2(\tau_2)^2 + a_3(\tau_3)^2) / (a_1\tau_1 + a_2\tau_2 + a_3\tau_3)$$
